# Supplementary material
Source: PubMed Central journal article supplement (PMC5682219)
Supplement: NIHMS908858-supplement-supplement_1.pdf [file NIHMS908858-supplement-supplement_1.pdf]

## ONLINE SUPPLEMENT

### Personal-Level Exposures to Environmental Temperatures are Superior Predictors of Endothelial-Dependent Vasodilatation than Outdoor-Ambient Levels

Chinedu Ejike<sup>1</sup>; Lu Wang<sup>2</sup>; Wei Huang<sup>3</sup>; Masako Morishita<sup>4</sup>; Robert L Bard<sup>1</sup>; Zhichao Sun<sup>2</sup>,  
Zhensheng Xia<sup>2</sup>; Jack Harkema<sup>5</sup>; Sanjay Rajagopalan<sup>6</sup>, Robert D Brook<sup>1</sup>

<sup>1</sup>Department of Internal Medicine, University of Michigan Medical School, Ann Arbor, MI;

<sup>2</sup>School of Public Health, University of Michigan, Ann Arbor, MI; <sup>3</sup>School of Public Health, Peking University, Beijing China; <sup>4</sup>Department of Family Medicine, College of Human Medicine, Michigan State University, East Lansing, MI;; <sup>5</sup>College of Veterinary Medicine, Michigan State University, East Lansing, MI; <sup>6</sup>Division of Cardiovascular Medicine, Case Western Reserve Medical School, Cleveland OH.

#### Correspondences:

Robert D Brook, MD

Division of Cardiovascular Medicine

24 Frank Lloyd Wright Drive

PO Box 322

Ann Arbor, MI, 48106

(734) 998-5627

Fax: (734) 232-2292

[rodbrok@med.umich.edu](mailto:rodbrok@med.umich.edu)

**ONLINE FIGURE LEGEND**

**Figure S1. Study Protocol Flow Chart**

**Figure S1**

|                                                                                         | Study Block 1                       |       |                                     | Washout   | Study Block 2                       |       |                                     |
|-----------------------------------------------------------------------------------------|-------------------------------------|-------|-------------------------------------|-----------|-------------------------------------|-------|-------------------------------------|
|                                                                                         | Visit Day 1                         | Night | Visit Day 2                         | 6-13 days | Visit Day 1                         | Night | Visit Day 2                         |
| <b>Cardiovascular Outcomes</b><br>Visit days 1 and 2 (8 am- 9 am)                       |                                     |       |                                     |           |                                     |       |                                     |
| Automated Blood Pressure                                                                | X                                   |       | X                                   |           | X                                   |       | X                                   |
| Heart Rate Variability                                                                  | X                                   |       | X                                   |           | X                                   |       | X                                   |
| Flow-mediated dilatation                                                                | X                                   |       | X                                   |           | X                                   |       | X                                   |
| <b>Personal Environmental Monitoring</b><br>Visit day 1 (9 am) until visit day 2 (8 am) |                                     |       |                                     |           |                                     |       |                                     |
| Fine particulate matter                                                                 | X                                   | X     |                                     |           | X                                   | X     |                                     |
| Temperature                                                                             | X                                   | X     |                                     |           | X                                   | X     |                                     |
| <b>Sleep Monitoring</b><br>Visit day 1 (Bedtime) until visit day 2 (awake)              |                                     |       |                                     |           |                                     |       |                                     |
| WatchPAT monitor                                                                        |                                     | X     |                                     |           |                                     | X     |                                     |
| <b>Outdoor Environmental Monitoring</b>                                                 |                                     |       |                                     |           |                                     |       |                                     |
| Ambient temperature<br>Ambient fine particulate matter                                  | Continuous<br>for 1-7 days<br>prior |       | Continuous<br>for 1-7 days<br>prior |           | Continuous<br>for 1-7 days<br>prior |       | Continuous<br>for 1-7 days<br>prior |
